# Supplementary material for: Urine recirculation prolongs normothermic kidney perfusion via more optimal metabolic homeostasis—a proteomics study
Source: PubMed Central journal article supplement — Am J Transplant. 2020 Nov 4;21(5):1740–53. doi: 10.1111/ajt.16334 (PMC8246941; doi:10.1111/ajt.16334), 2020-11-04

# Arterial flow of kidneys perfused with and without urine recirculation

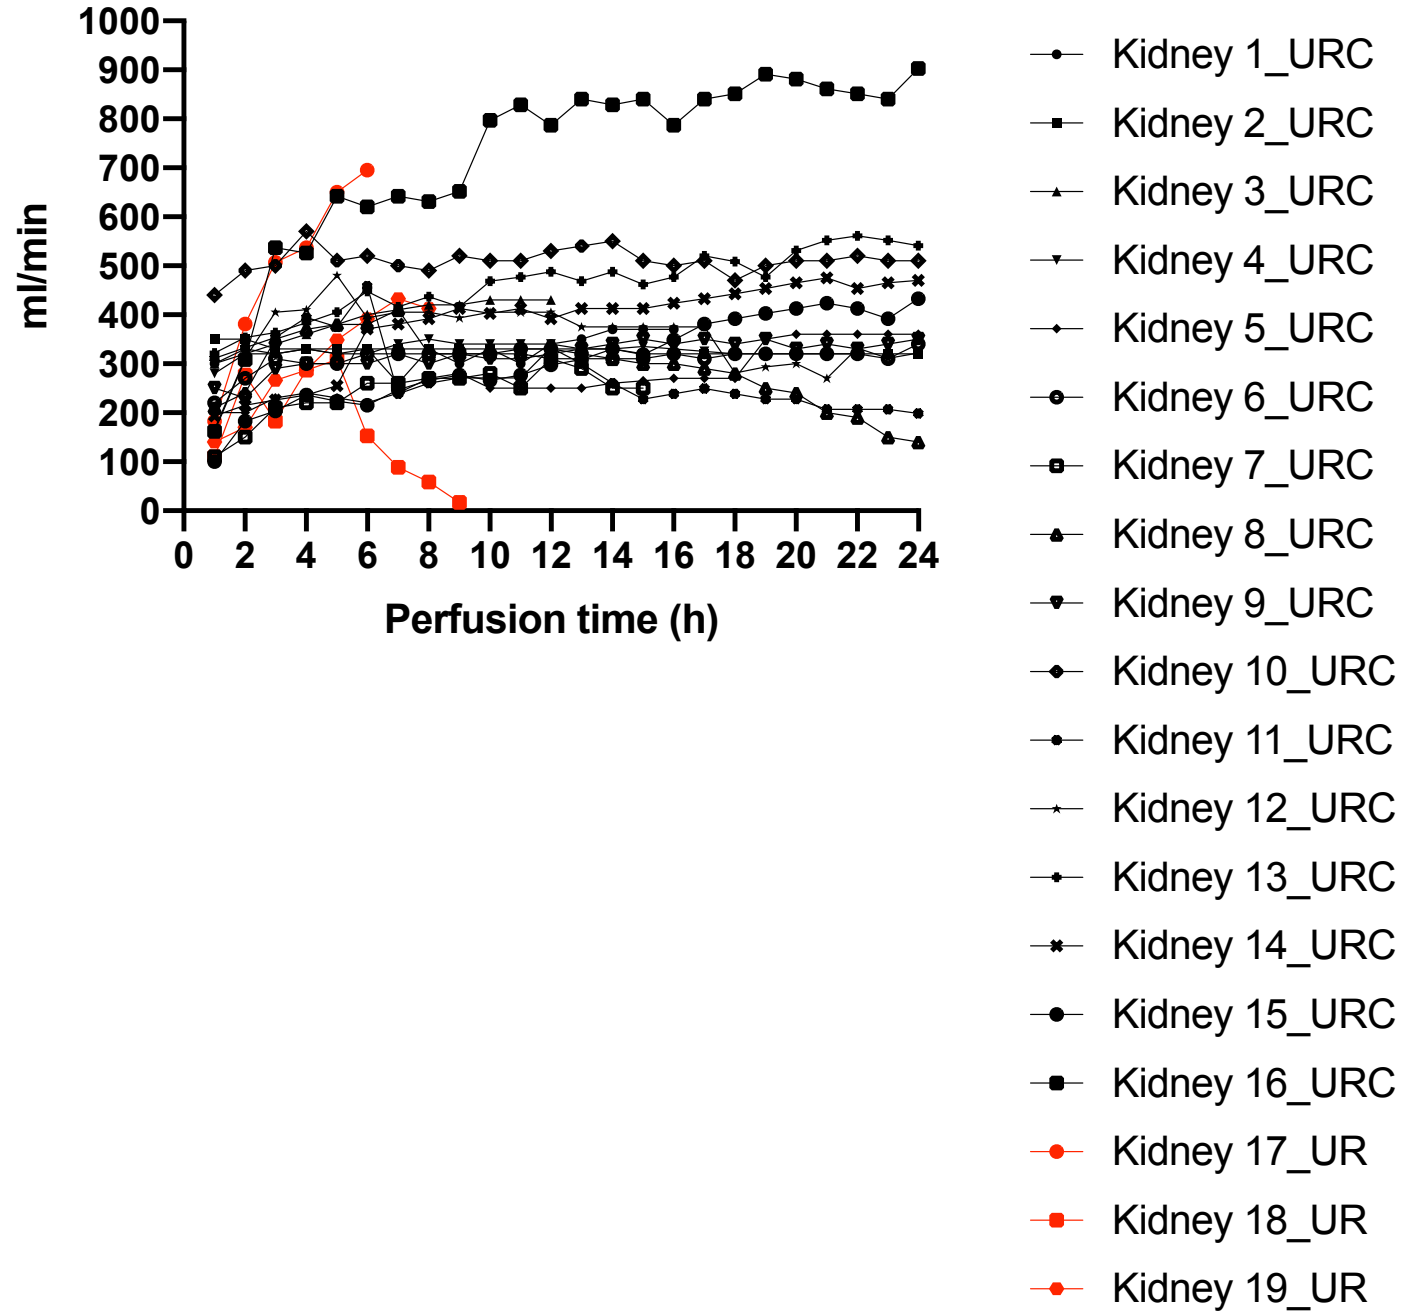

A

# Intrarenal resistance of kidneys perfused with and without urine recirculation

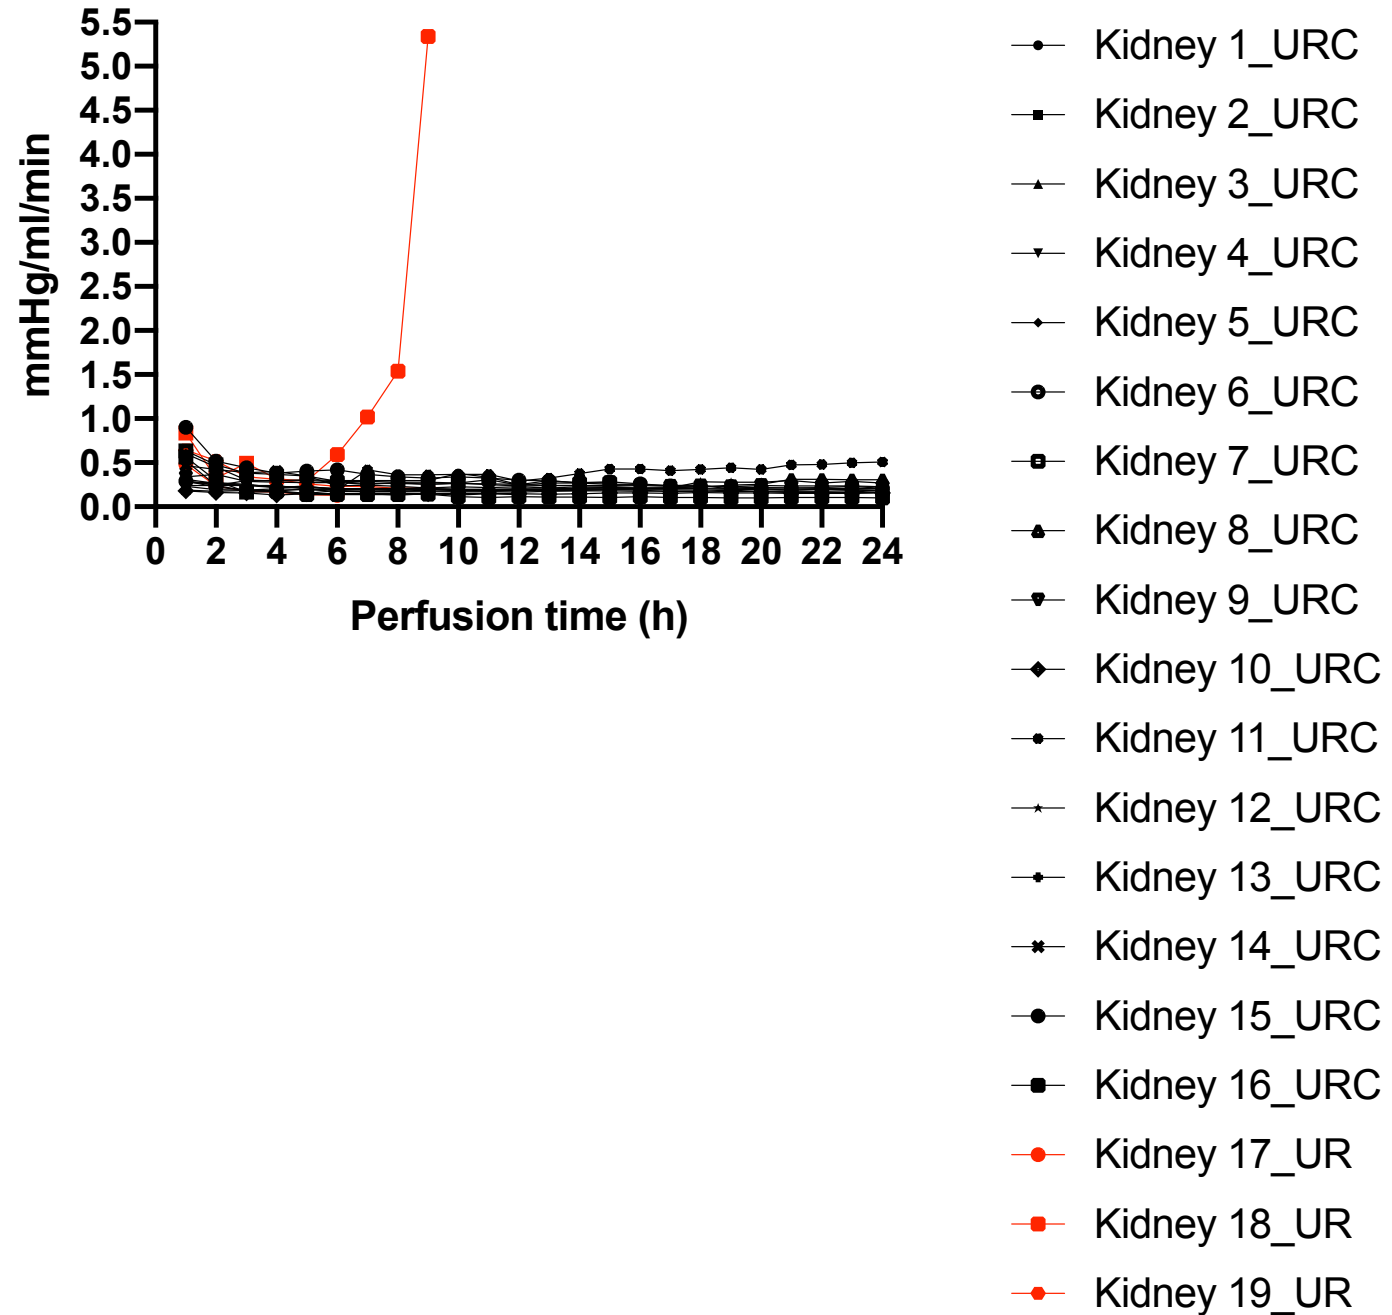

# pH of kidneys perfused with and without urine recirculation

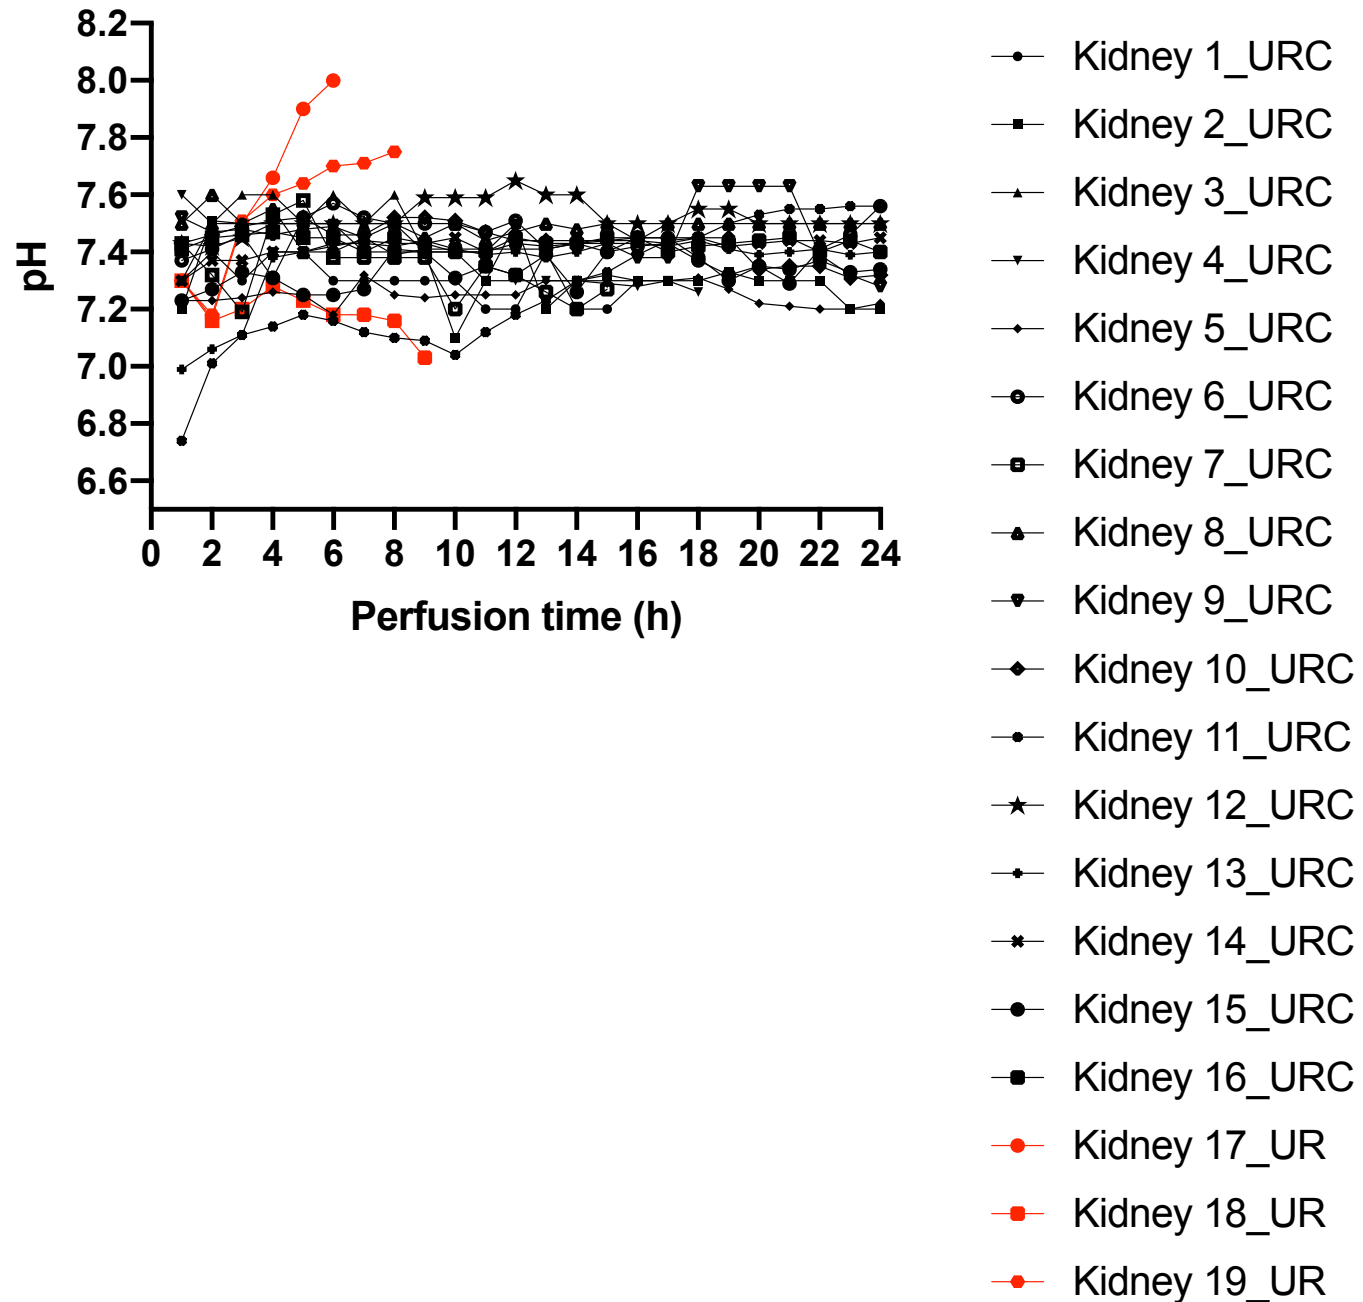

Supplement: AJT-21-1740-s003.pdf [file AJT-21-1740-s003.pdf]
