# Supplementary figures and images for: Urine recirculation prolongs normothermic kidney perfusion via more optimal metabolic homeostasis—a proteomics study
Source: PubMed Central journal article supplement — Am J Transplant. 2020 Nov 4;21(5):1740–53. doi: 10.1111/ajt.16334 (PMC8246941; doi:10.1111/ajt.16334), 2020-11-04

Figure 1

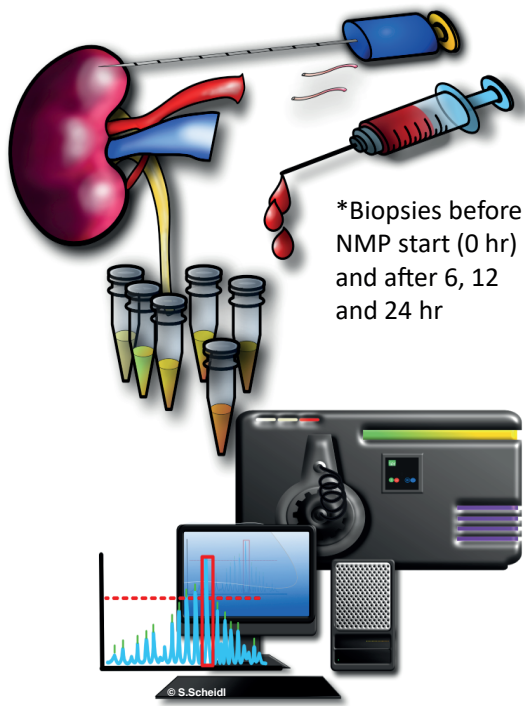

**Experimental workflow**

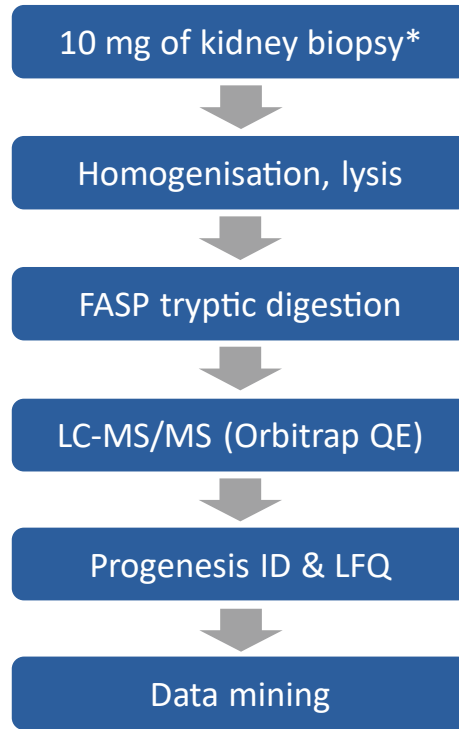

**Proteomics**

A

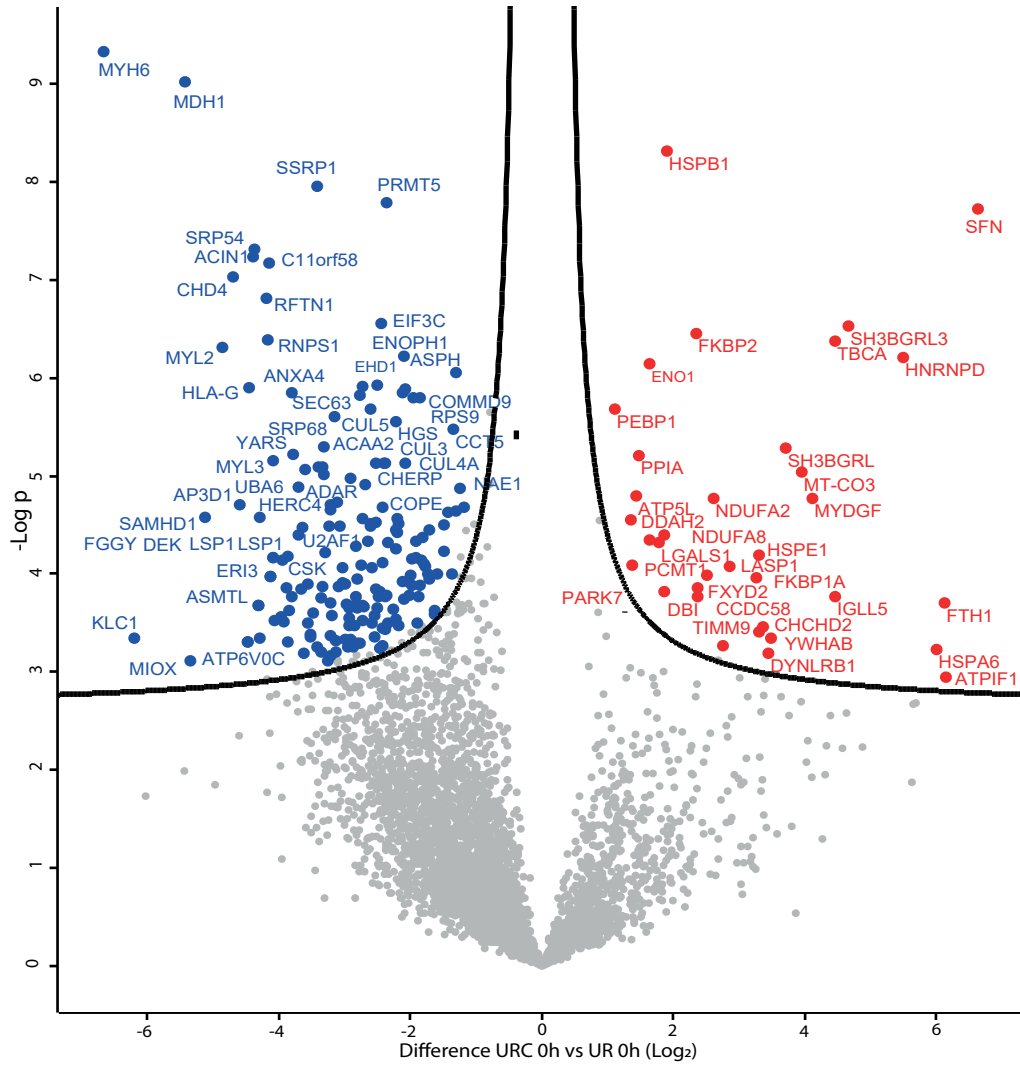

B

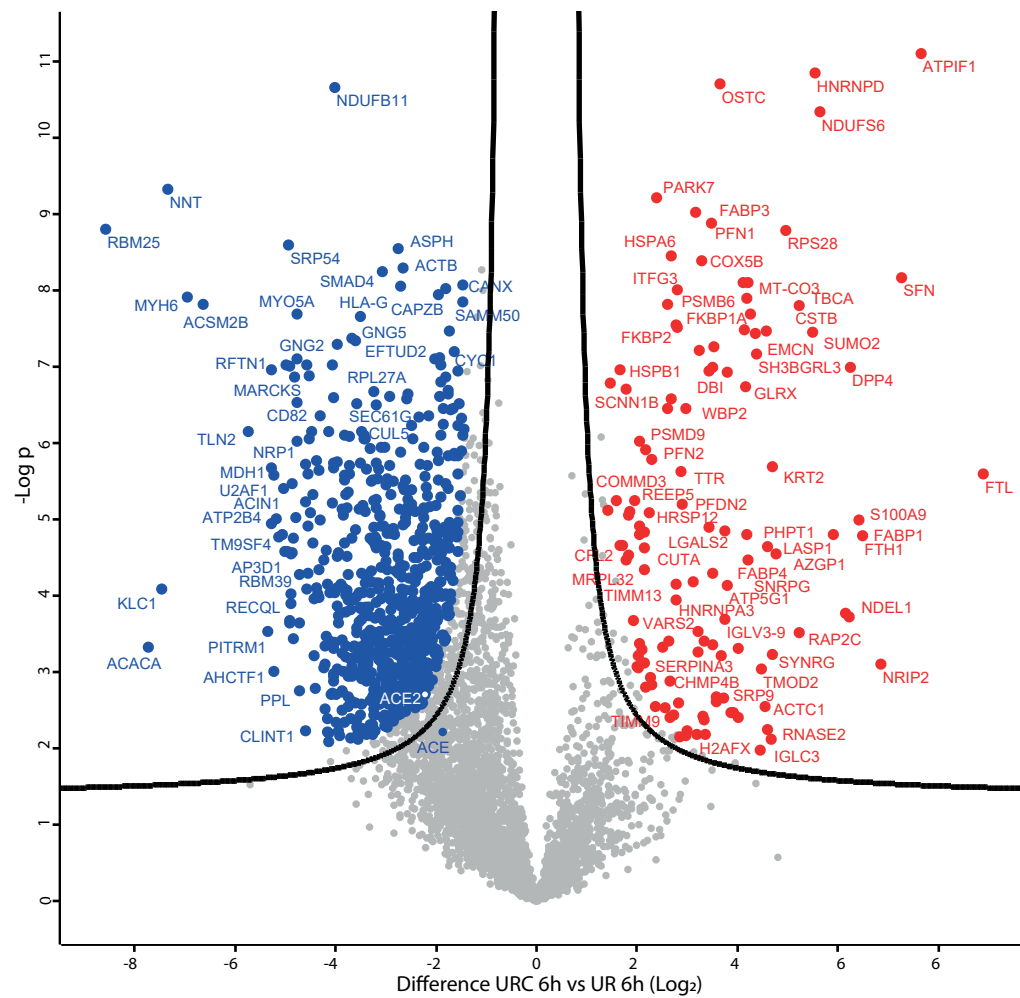

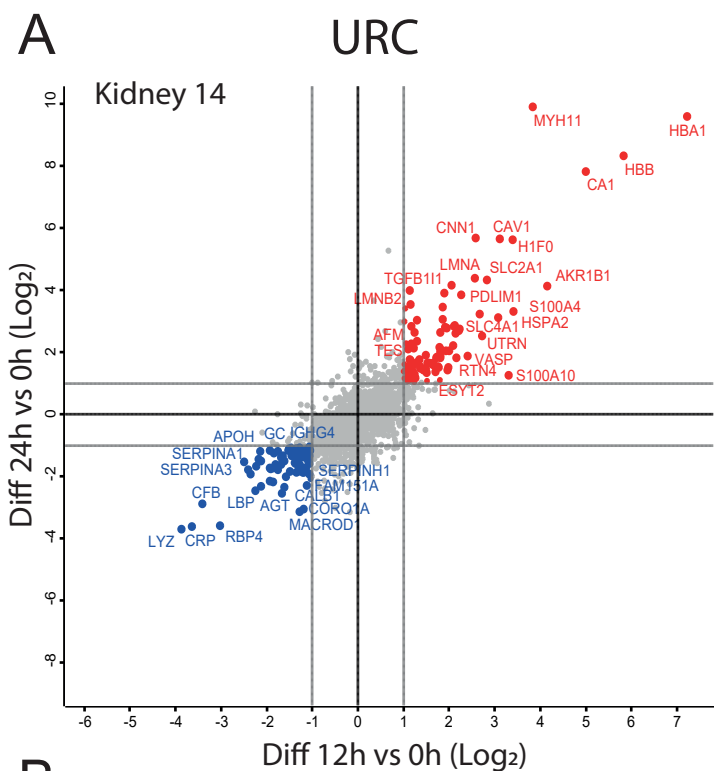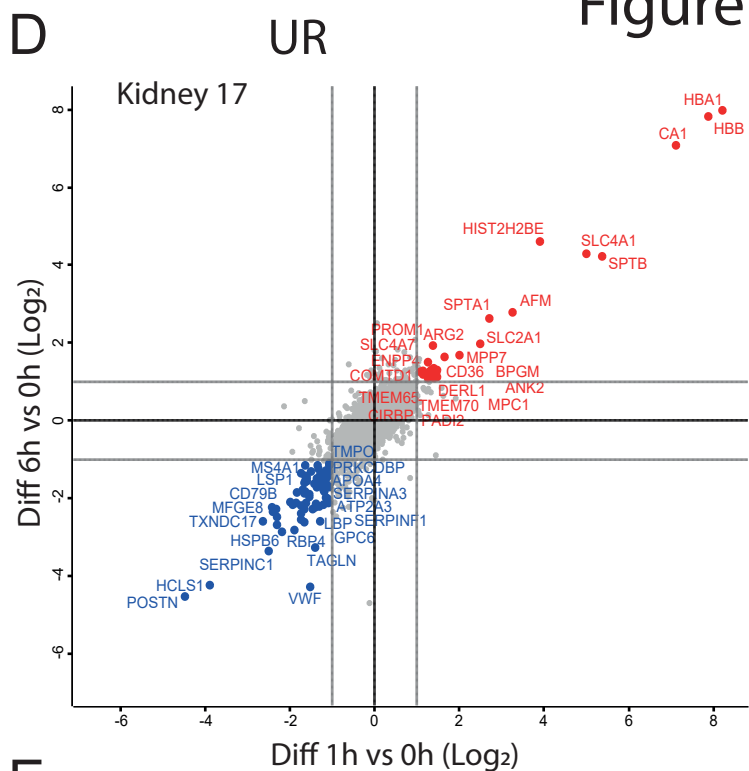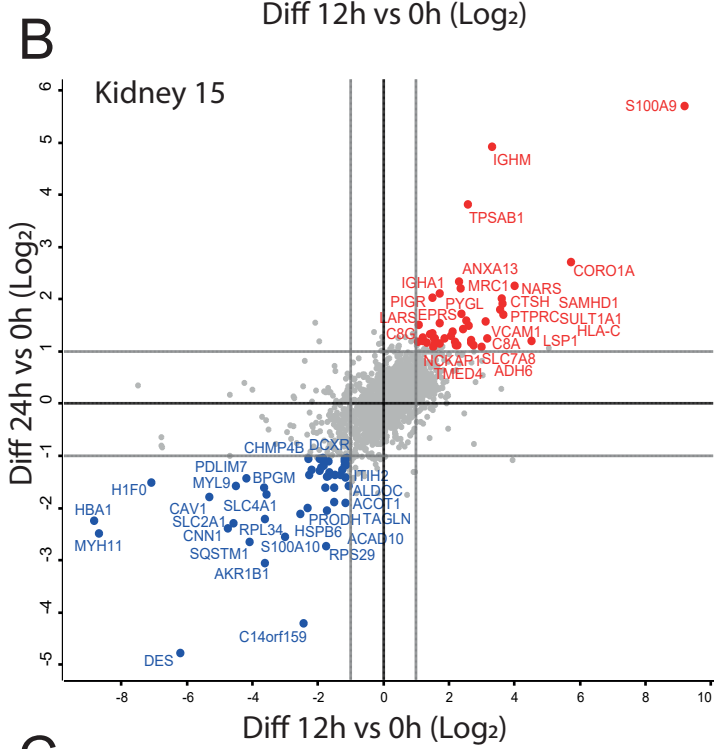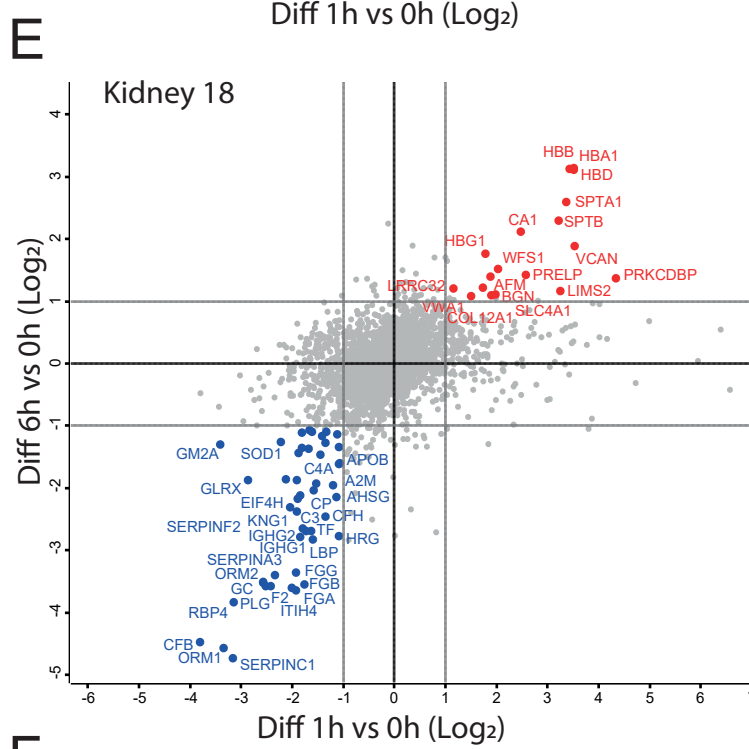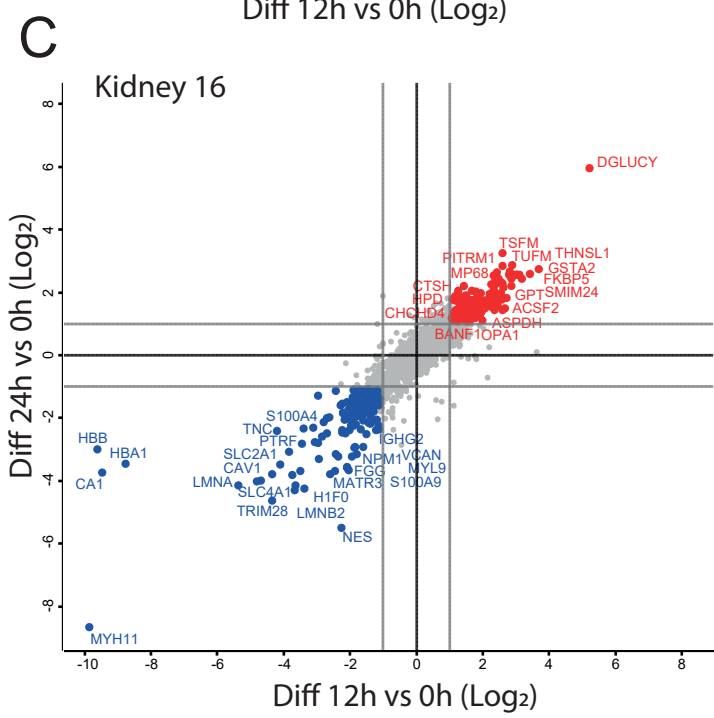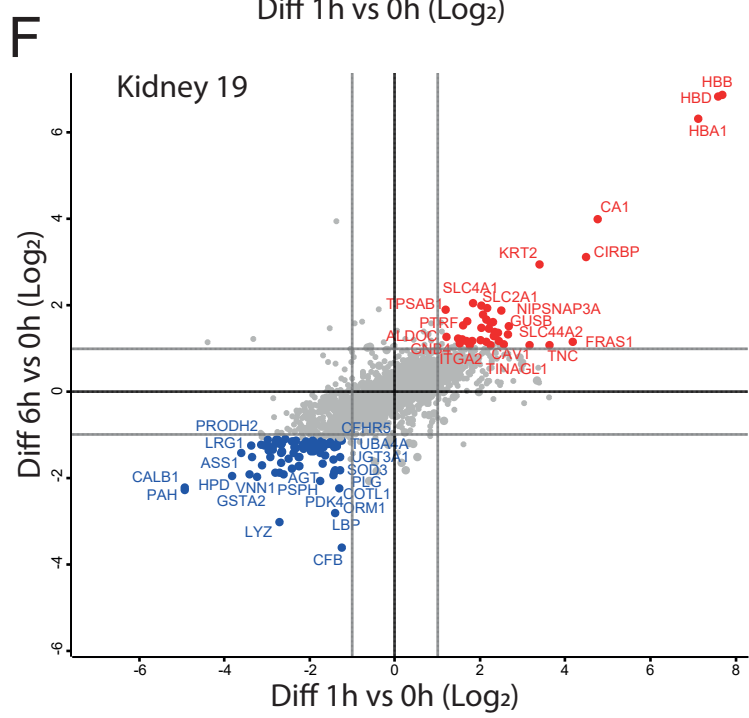

Figure 4

A

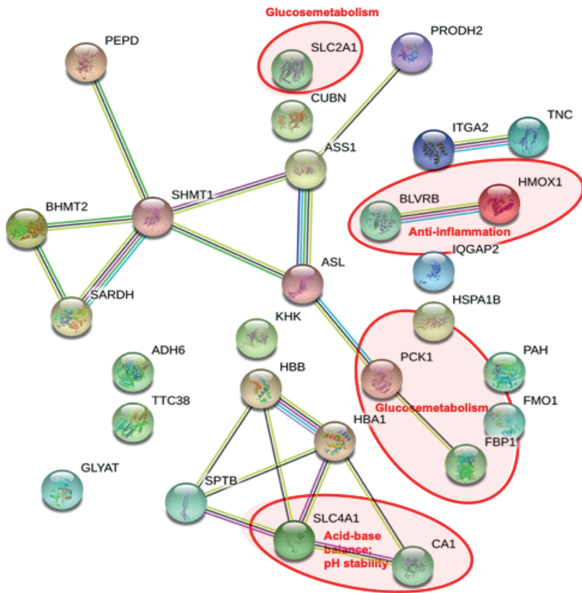

C

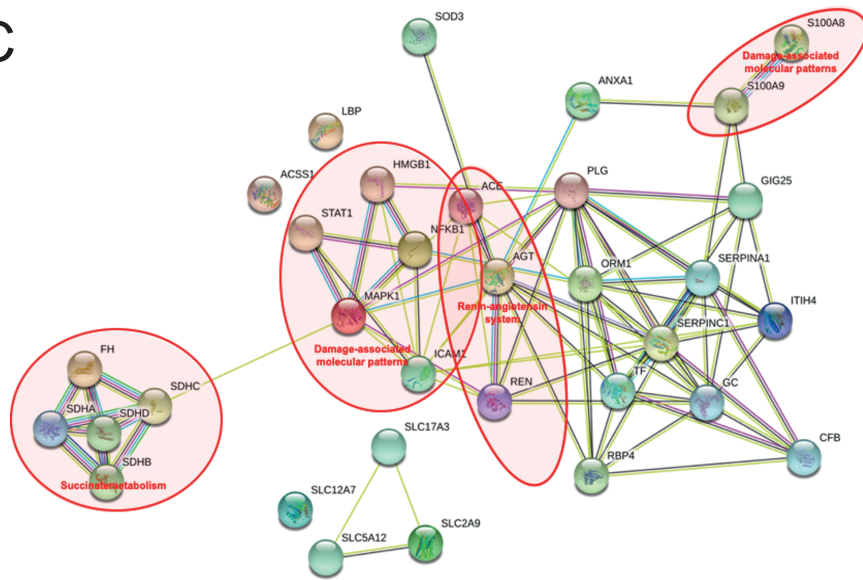

B

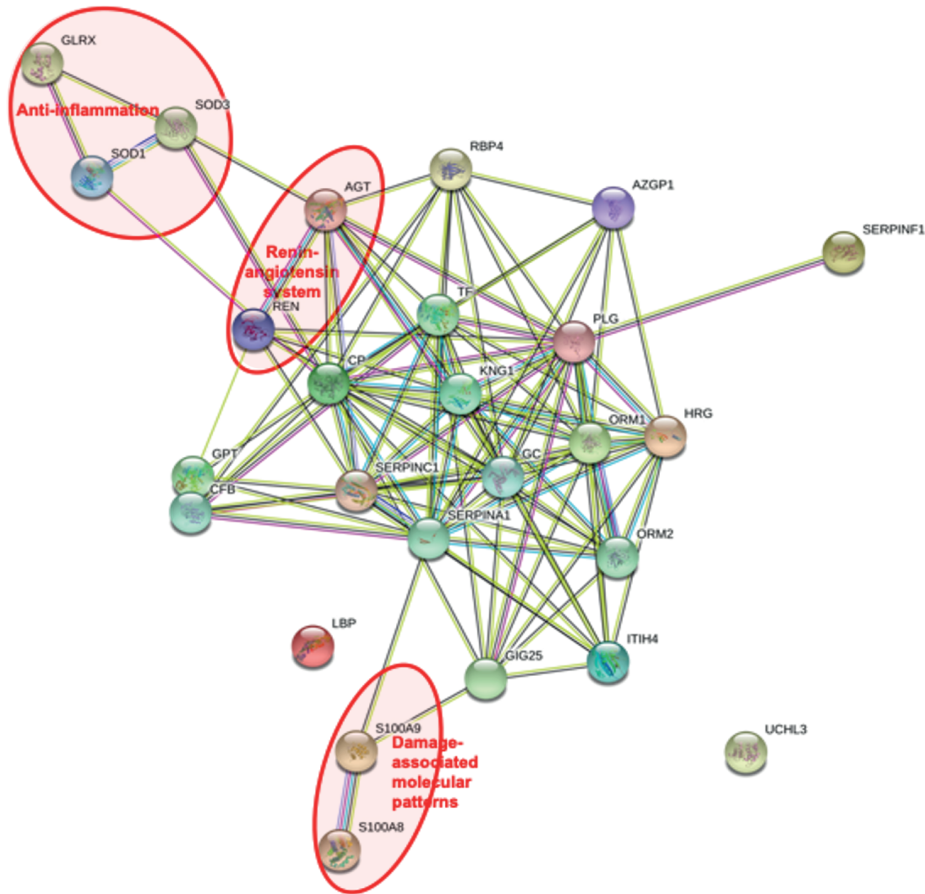

D

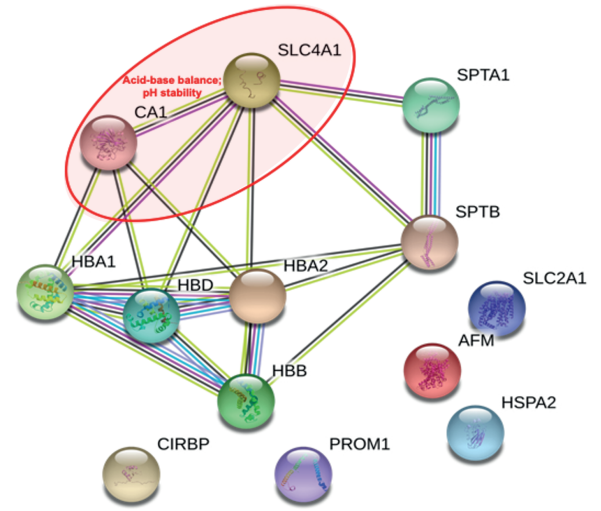



# Figure 5

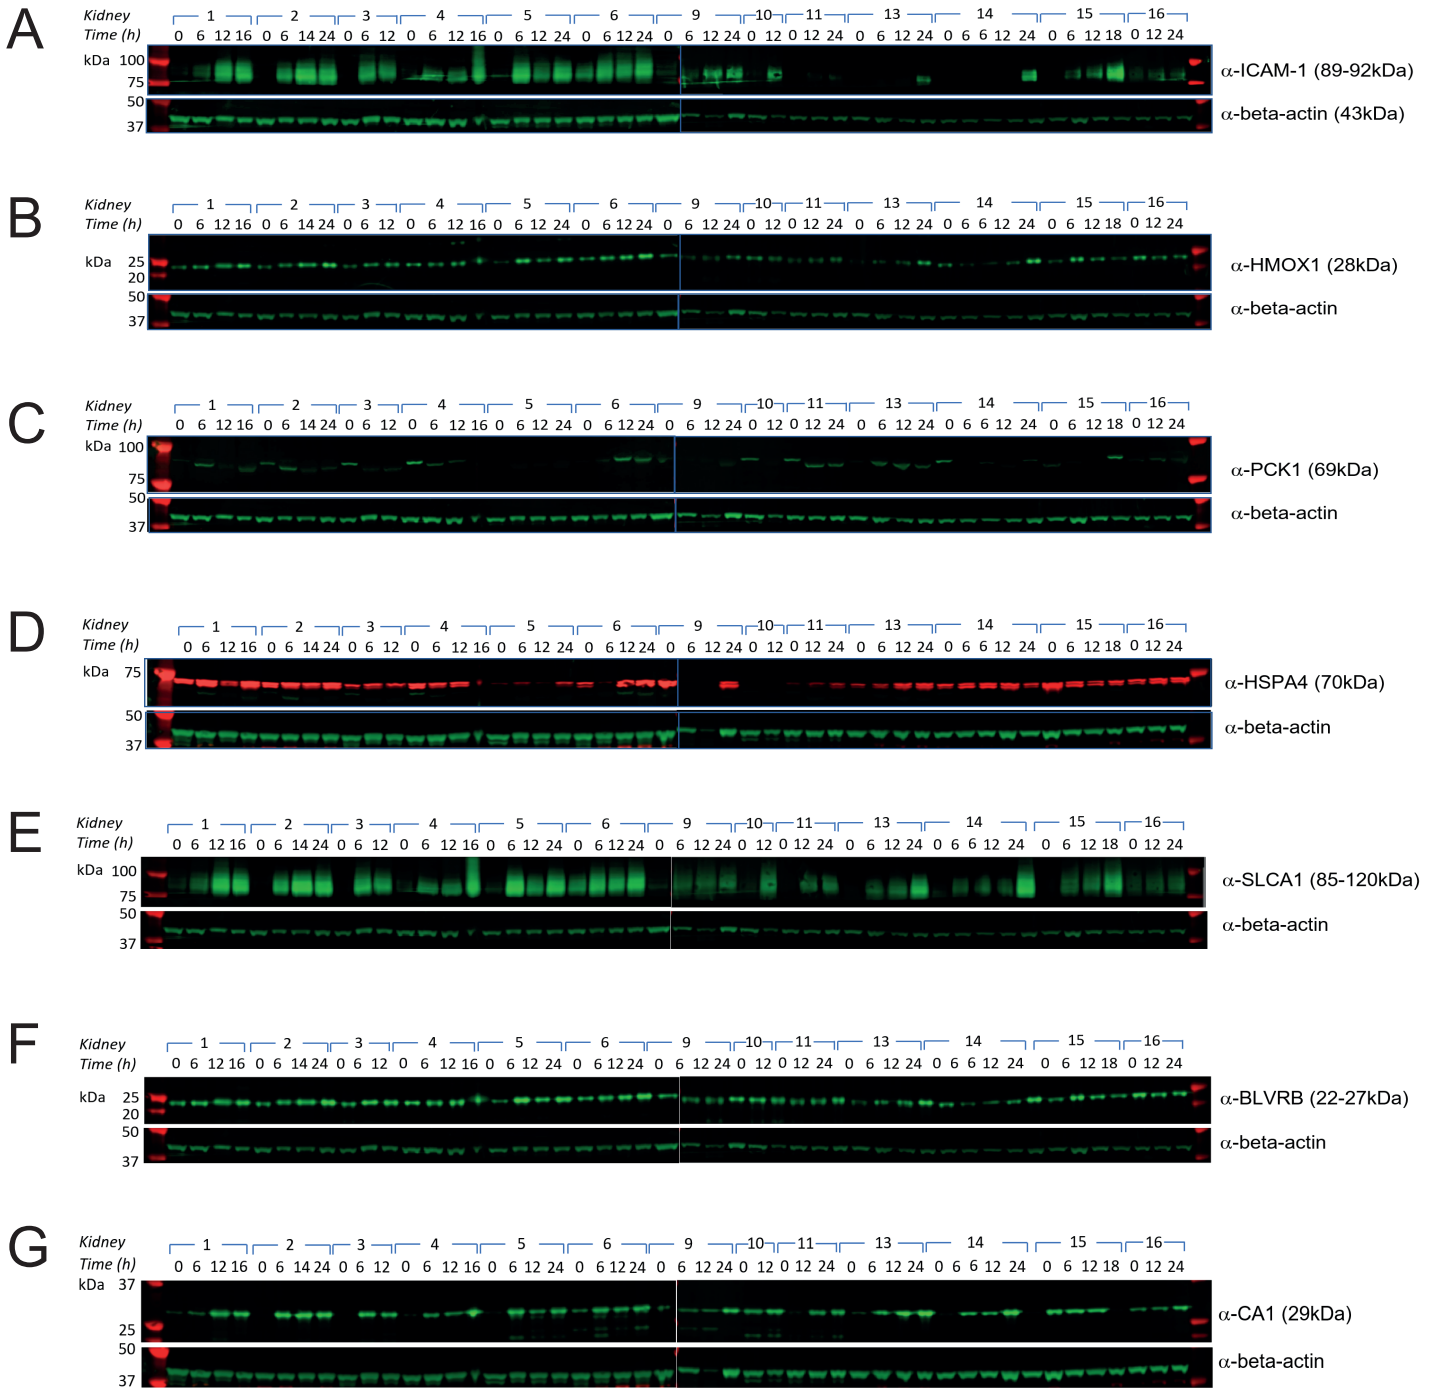

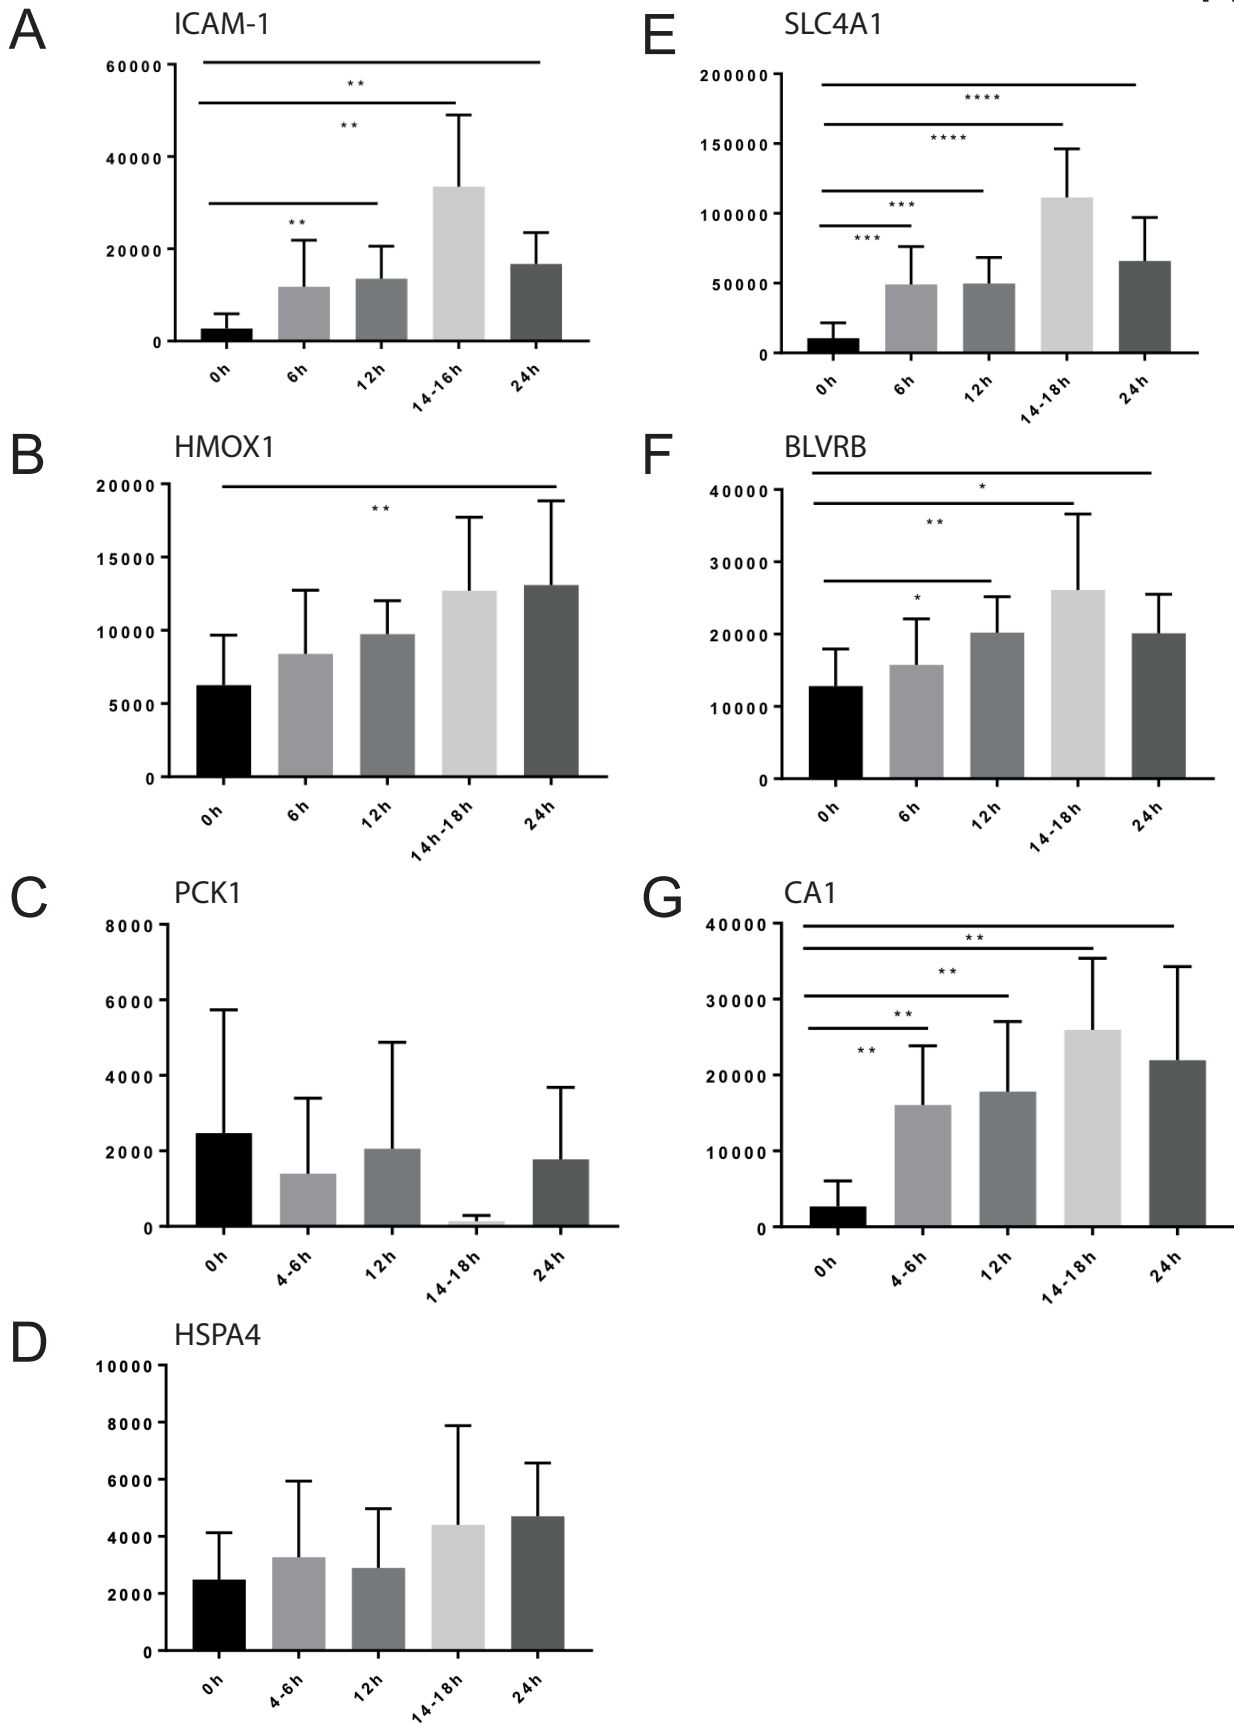

Figure S1

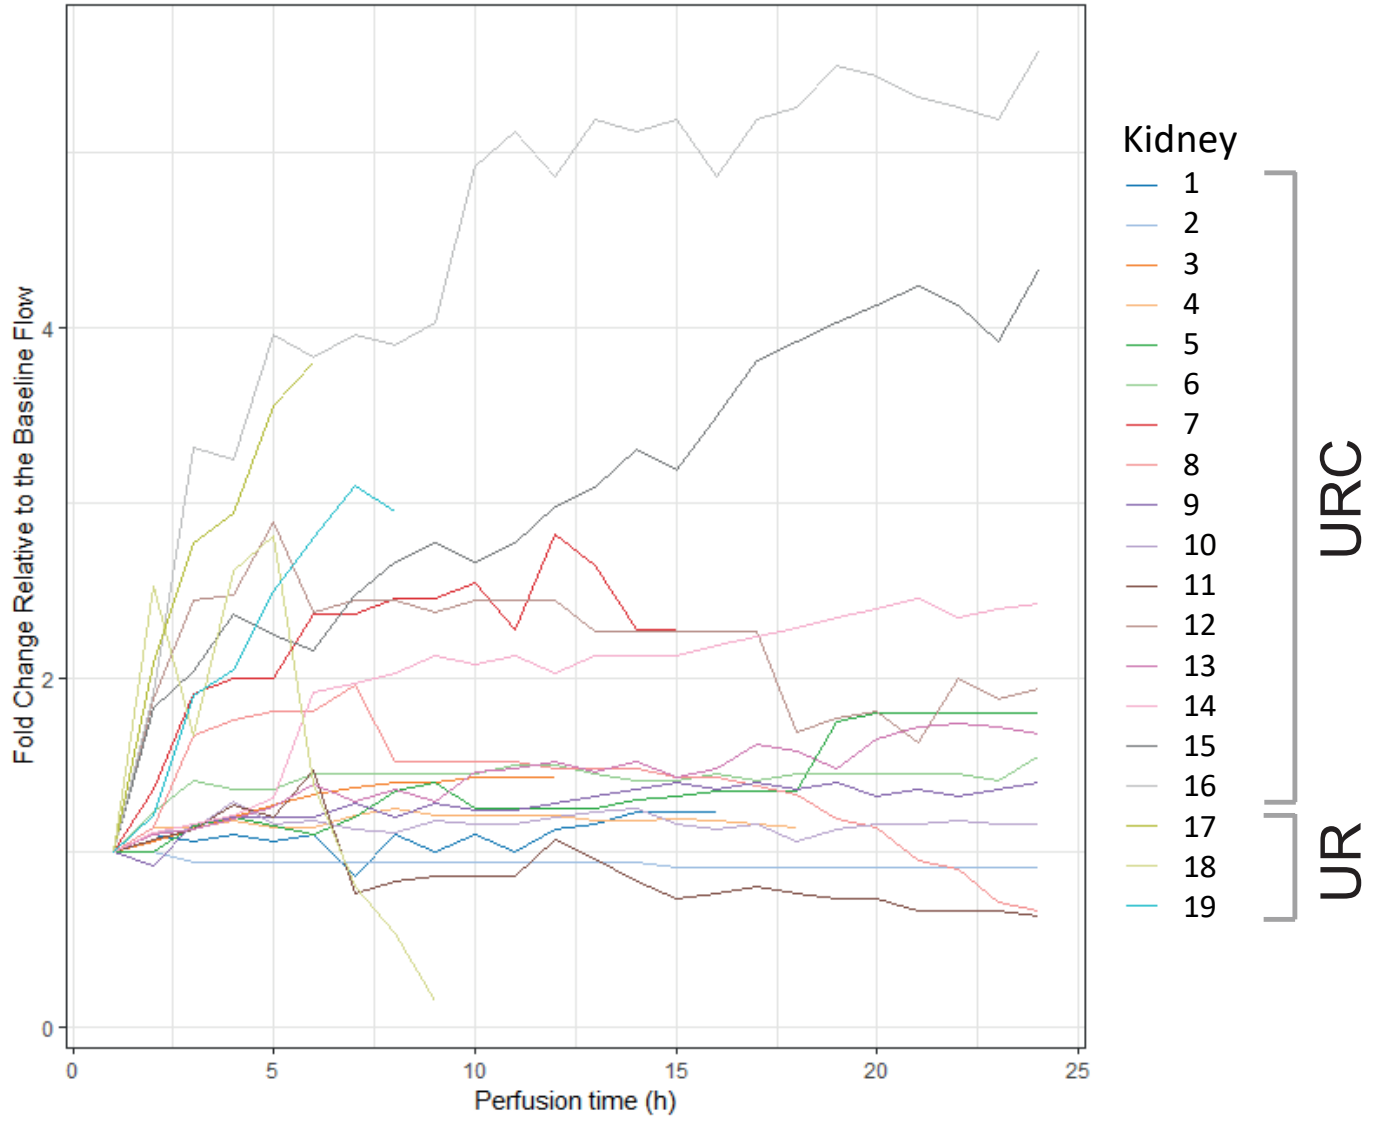

Figure S2

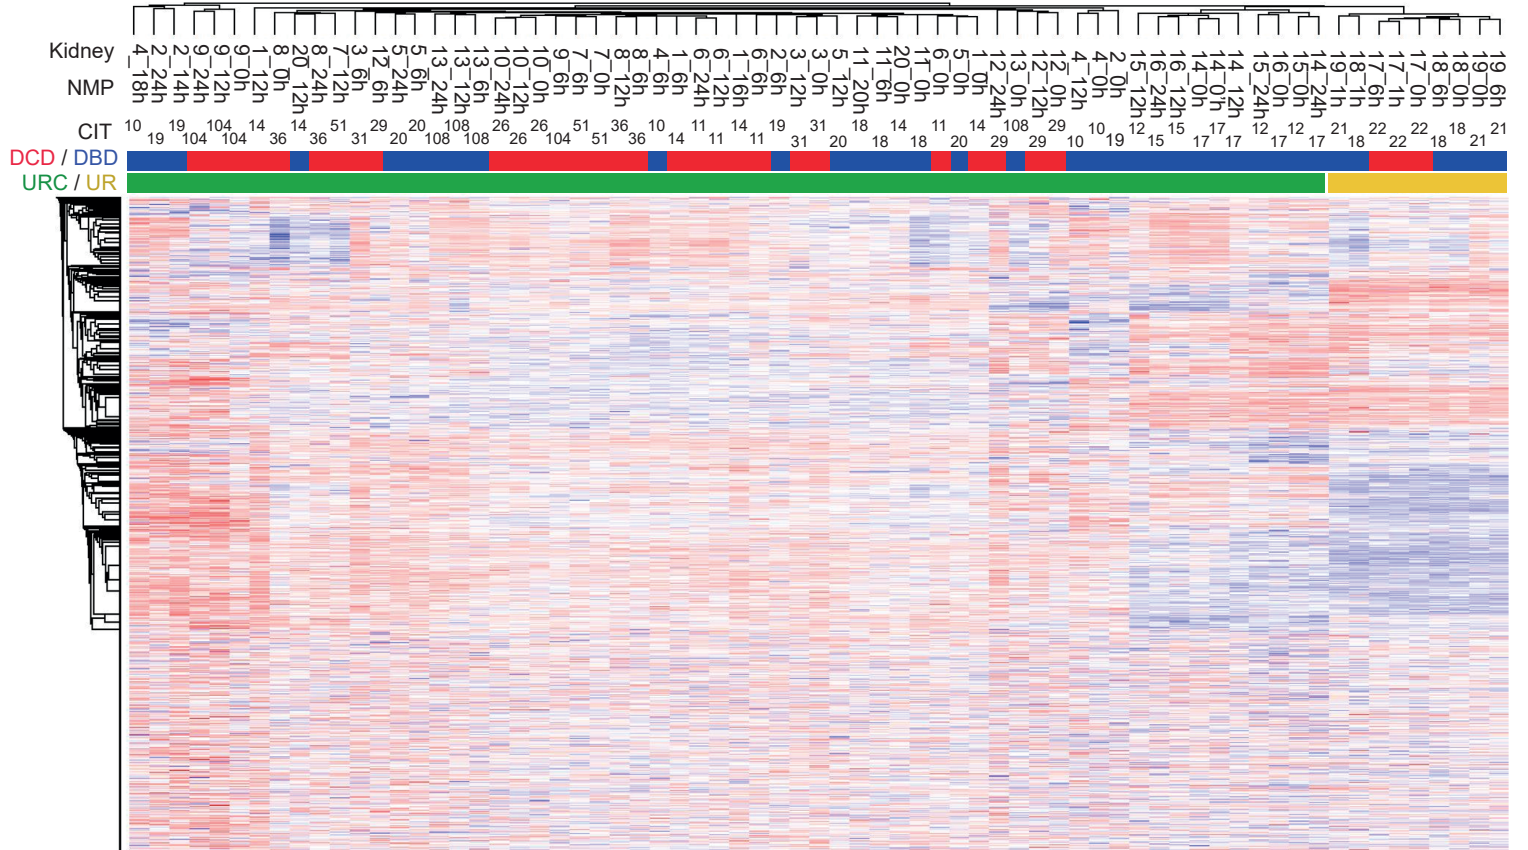

Supplement: AJT-21-1740-s005.pdf [file AJT-21-1740-s005.pdf]
